# Supplementary material
Source: PubMed Central journal article supplement (PMC4579420)
Supplement: AEM.01823-15_zam999116657so1.pdf [file AEM.01823-15_zam999116657so1.pdf]

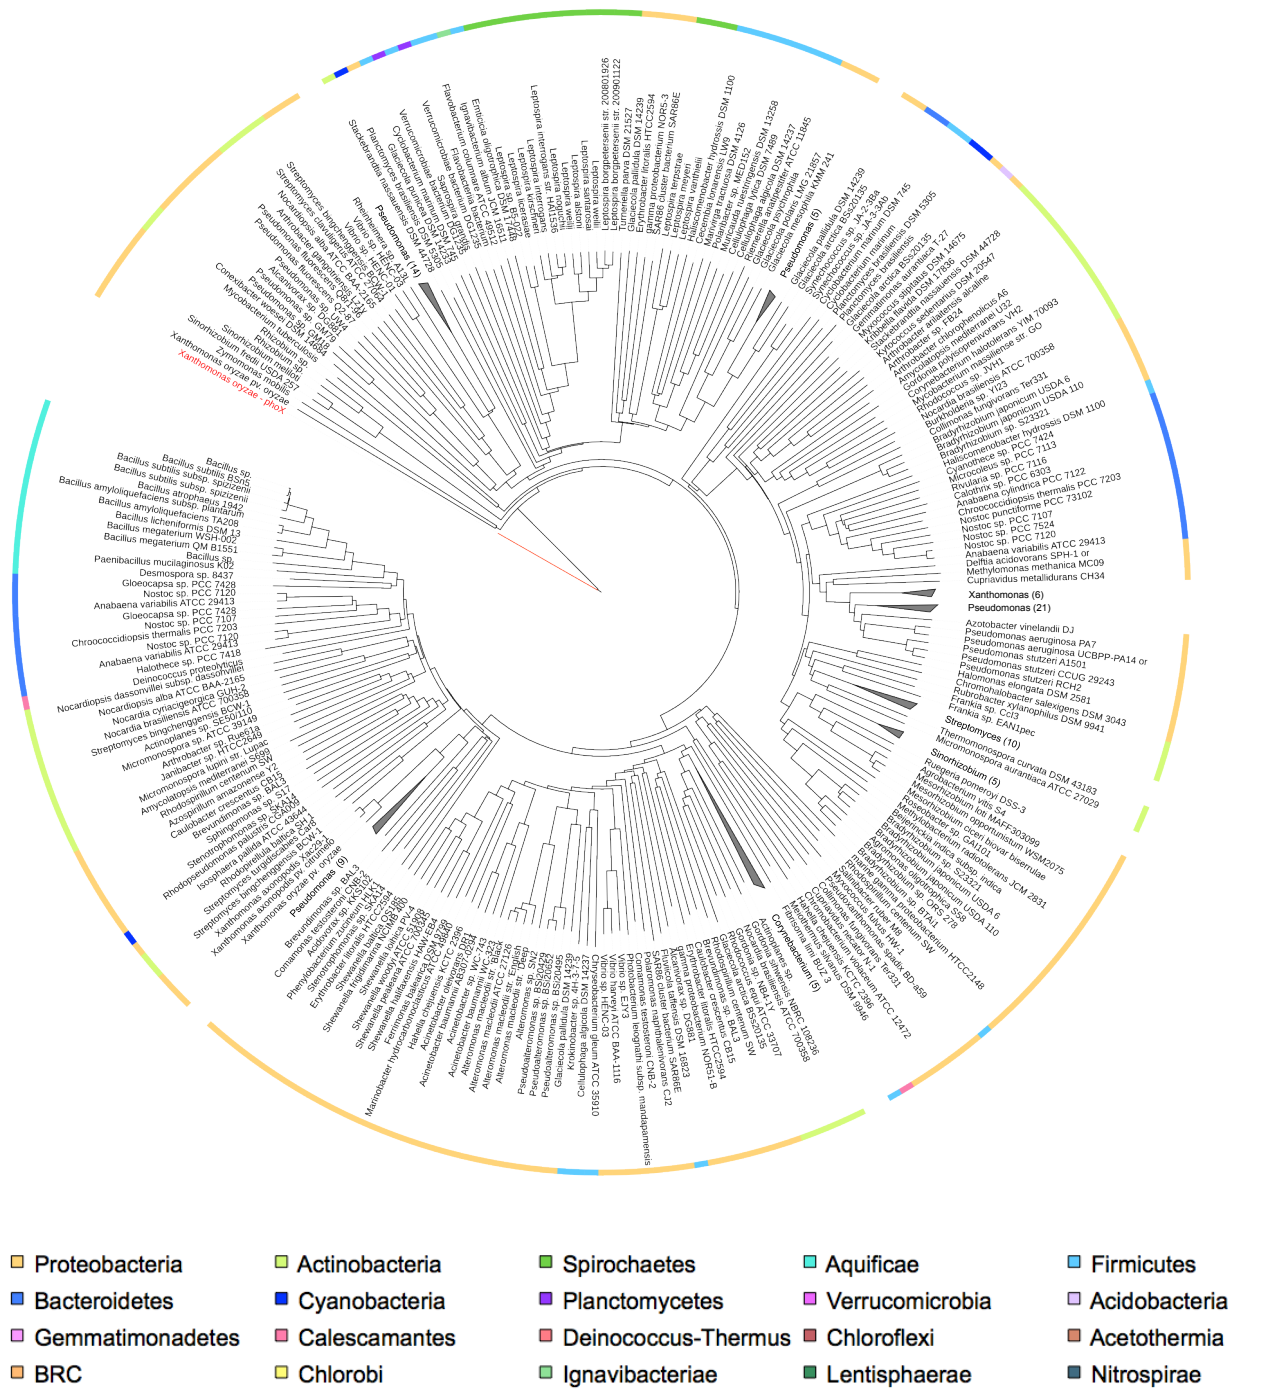

**FIGURE S1:** Neighbor-joining tree based on the amino acid sequences of the full length of the *phoD* genes. The tree was rooted using the sequence of the *phoX* alkaline phosphatase gene of *Xanthomonas oryzae* (in red).

**TABLE S1:** Accession numbers in EBI and NCBI databases and taxonomy of reference sequences used for the primer design of the PHOD primers

| #  | Accession number (EBI or NCBI) | Phylum         | Order               | Family                        | Species                                                             |
|----|--------------------------------|----------------|---------------------|-------------------------------|---------------------------------------------------------------------|
| 1  | ENAIEI26313                    | Actinobacteria | Actinomycetales     | Corynebacteriaceae            | <i>Corynebacterium glucuronolyticum</i> ATCC51867                   |
| 2  | ENAIBAF55139                   | Actinobacteria | Actinomycetales     | Corynebacteriaceae            | <i>Corynebacterium glutamicum</i>                                   |
| 3  | ENAIBAB99658                   | Actinobacteria | Actinomycetales     | Corynebacteriaceae            | <i>Corynebacterium glutamicum</i> ATCC13032                         |
| 4  | ENAIAFG72794                   | Actinobacteria | Actinomycetales     | Corynebacteriaceae            | <i>Corynebacterium halotolerans</i> DSM44683                        |
| 5  | ENAIAFG73056                   | Actinobacteria | Actinomycetales     | Corynebacteriaceae            | <i>Corynebacterium halotolerans</i> DSM44683                        |
| 6  | ENAIAFG73652                   | Actinobacteria | Actinomycetales     | Corynebacteriaceae            | <i>Corynebacterium halotolerans</i> DSM44683                        |
| 7  | ENAIAAGG67341                  | Actinobacteria | Actinomycetales     | Corynebacteriaceae            | <i>Corynebacterium halotolerans</i> DSM44683                        |
| 8  | ENAIAFA75231                   | Actinobacteria | Actinomycetales     | Gordoniaceae                  | <i>Gordonia polyisoprenivorans</i> VH2                              |
| 9  | ENAIGAC61596                   | Actinobacteria | Actinomycetales     | Gordoniaceae                  | <i>Gordonia sihwensis</i> NBRC108236                                |
| 10 | ENAIEMP12511                   | Actinobacteria | Actinomycetales     | Gordoniaceae                  | <i>Gordonia</i> sp                                                  |
| 11 | ENAIAJG68675                   | Actinobacteria | Actinomycetales     | Mycobacteriaceae              | <i>Mycobacterium tuberculosis</i> str NITR203                       |
| 12 | ENAIAFN64192                   | Actinobacteria | Actinomycetales     | Mycobacteriaceae              | <i>Mycobacterium tuberculosis</i> complex                           |
| 13 | ENAIAFT99034                   | Actinobacteria | Actinomycetales     | Nocardiaceae                  | <i>Nocardia brasiliensis</i> ATCC700358                             |
| 14 | ENAIAFU00244                   | Actinobacteria | Actinomycetales     | Nocardiaceae                  | <i>Nocardia brasiliensis</i> ATCC700358                             |
| 15 | ENAIAFU03643                   | Actinobacteria | Actinomycetales     | Nocardiaceae                  | <i>Nocardia brasiliensis</i> ATCC700358                             |
| 16 | ENAICCF63942                   | Actinobacteria | Actinomycetales     | Nocardiaceae                  | <i>Nocardia cyriacigeorgica</i>                                     |
| 17 | ENAIEGD25772                   | Actinobacteria | Actinomycetales     | Nocardiaceae                  | <i>Rhodococcus equi</i> ATCC33707                                   |
| 18 | ENAIEJI95441                   | Actinobacteria | Actinomycetales     | Nocardiaceae                  | <i>Rhodococcus</i> sp JVH1                                          |
| 19 | ENAIBAD10394                   | Actinobacteria | Actinomycetales     | Frankiaceae                   | <i>Frankia</i> sp ccl3                                              |
| 20 | ENAIBAW10760                   | Actinobacteria | Actinomycetales     | Frankiaceae                   | <i>Frankia</i> sp EAN1                                              |
| 21 | ENAIAAD44130                   | Actinobacteria | Actinomycetales     | Glycomycetaceae               | <i>Stackebrandtia nassauensis</i> DSM44728                          |
| 22 | ENAIAAD45345                   | Actinobacteria | Actinomycetales     | Glycomycetaceae               | <i>Stackebrandtia nassauensis</i> DSM44728                          |
| 23 | ENAIAAC40996                   | Actinobacteria | Actinomycetales     | Micrococcinea/Micrococca ceae | <i>Arthrobacter chlorophenolicus</i> A6                             |
| 24 | ENAIAACV06763                  | Actinobacteria | Actinomycetales     | Dermaprocaceae                | <i>Kytococcus sedentarius</i> DSM20547                              |
| 25 | ENAIEAQ00942                   | Actinobacteria | Actinomycetales     | Intrasporangiaceae            | <i>Janibacter</i> sp HTCC2649                                       |
| 26 | ENAICBT74545                   | Actinobacteria | Actinomycetales     | Micrococcaceae                | <i>Arthrobacter arilaitensis</i>                                    |
| 27 | ENAIEMR00121                   | Actinobacteria | Actinomycetales     | Micrococcaceae                | <i>Arthrobacter gangotriensis</i>                                   |
| 28 | ENAIAFR30629                   | Actinobacteria | Actinomycetales     | Micrococcaceae                | <i>Arthrobacter</i> sp                                              |
| 29 | ENAIBAK02451                   | Actinobacteria | Actinomycetales     | Micrococcaceae                | <i>Arthrobacter</i> sp FB24                                         |
| 30 | ENAIAEV83725                   | Actinobacteria | Actinomycetales     | Micromonosporaceae            | <i>Actinoplanes</i> sp SE50                                         |
| 31 | ENAIAEV87274                   | Actinobacteria | Actinomycetales     | Micromonosporaceae            | <i>Actinoplanes</i> sp SE50                                         |
| 32 | ENAIAADL48407                  | Actinobacteria | Actinomycetales     | Micromonosporaceae            | <i>Micromonospora aurantiaca</i> ATCC 27029e                        |
| 33 | ENAICCH17164                   | Actinobacteria | Actinomycetales     | Micromonosporaceae            | <i>Micromonospora lupini</i>                                        |
| 34 | ENAIEEP71055                   | Actinobacteria | Actinomycetales     | Micromonosporaceae            | <i>Micromonospora</i> sp ATCC39149                                  |
| 35 | ENAIAADB32048                  | Actinobacteria | Actinomycetales     | Nocardiodiaceae               | <i>Kribbella flavida</i> DSM17836                                   |
| 36 | ENAIAEK40043                   | Actinobacteria | Actinomycetales     | Pseudonocardiaceae            | <i>Amycolatopsis mediterranei</i> S699                              |
| 37 | ENAIAADJ48441                  | Actinobacteria | Actinomycetales     | Pseudonocardiaceae            | <i>Amycolatopsis mediterranei</i> U32                               |
| 38 | ENAIBAC74775                   | Actinobacteria | Actinomycetales     | Streptomycetaceae             | <i>Streptomyces avermitilis</i> MA-4680                             |
| 39 | ENAIAAD110639                  | Actinobacteria | Actinomycetales     | Streptomycetaceae             | <i>Streptomyces bingchenggensis</i> BCW                             |
| 40 | ENAIAAD110779                  | Actinobacteria | Actinomycetales     | Streptomycetaceae             | <i>Streptomyces bingchenggensis</i> BCW                             |
| 41 | ENAIAAD111949                  | Actinobacteria | Actinomycetales     | Streptomycetaceae             | <i>Streptomyces bingchenggensis</i> BCW                             |
| 42 | ENAIAAD112233                  | Actinobacteria | Actinomycetales     | Streptomycetaceae             | <i>Streptomyces bingchenggensis</i> BCW                             |
| 43 | ENAIEFG06649                   | Actinobacteria | Actinomycetales     | Streptomycetaceae             | <i>Streptomyces clavuligerus</i> ATCC27064                          |
| 44 | ENAICAD55169                   | Actinobacteria | Actinomycetales     | Streptomycetaceae             | <i>Streptomyces coelicolor</i>                                      |
| 45 | ENAICCK31695                   | Actinobacteria | Actinomycetales     | Streptomycetaceae             | <i>Streptomyces davawensis</i> JCM4913                              |
| 46 | ENAIAADW06950                  | Actinobacteria | Actinomycetales     | Streptomycetaceae             | <i>Streptomyces flavogriseus</i> ATCC 33331                         |
| 47 | ENAIBAG23089                   | Actinobacteria | Actinomycetales     | Streptomycetaceae             | <i>Streptomyces griseus</i> subsp <i>griseus</i> NBRC13350          |
| 48 | ENAIAEY87979                   | Actinobacteria | Actinomycetales     | Streptomycetaceae             | <i>Streptomyces hygrosopicus</i> subsp <i>jinggangensis</i>         |
| 49 | ENAICBG74762                   | Actinobacteria | Actinomycetales     | Streptomycetaceae             | <i>Streptomyces scabiei</i>                                         |
| 50 | ENAIAEN08616                   | Actinobacteria | Actinomycetales     | Streptomycetaceae             | <i>Streptomyces</i> sp                                              |
| 51 | ENAIELP68656                   | Actinobacteria | Actinomycetales     | Streptomycetaceae             | <i>Streptomyces turgidiscabies</i>                                  |
| 52 | ENAICCA54151                   | Actinobacteria | Actinomycetales     | Streptomycetaceae             | <i>Streptomyces venezuelae</i> ATCC10712                            |
| 53 | ENAIAEM83182                   | Actinobacteria | Actinomycetales     | Streptomycetaceae             | <i>Streptomyces violaceus niger</i> Tu4113                          |
| 54 | ENAIAFR06971                   | Actinobacteria | Actinomycetales     | Nocardiopsaceae               | <i>Nocardiopsis alba</i> ATCCBAA                                    |
| 55 | ENAIAFR07079                   | Actinobacteria | Actinomycetales     | Nocardiopsaceae               | <i>Nocardiopsis alba</i> ATCCBAA                                    |
| 56 | ENAIAADH67544                  | Actinobacteria | Actinomycetales     | Nocardiopsaceae               | <i>Nocardiopsis dassonvillei</i> subsp <i>dassonvillei</i> DSM43111 |
| 57 | ENAIAACV99758                  | Actinobacteria | Actinomycetales     | Thermomonosporaceae           | <i>Thermomonospora curvata</i> DSM43183                             |
| 58 | ENAIBAG03284                   | Actinobacteria | Rubrobacterales     | Rubrobacteraceae              | <i>Rubrobacter xylanophilus</i> DSM9941                             |
| 59 | ENAIAADB49402                  | Actinobacteria | Solirubrobacterales | Conexibacteraceae             | <i>Conexibacter woesei</i> DSM14684                                 |
| 60 | ENAIEKB49993                   | Bacteroidetes  | Cytophagales        | Cyclobacteriaceae             | <i>Cecembia lonarensis</i> LW9                                      |
| 61 | ENAIAEL28382                   | Bacteroidetes  | Cytophagales        | Cyclobacteriaceae             | <i>Cyclobacterium marinum</i> DSM745                                |
| 62 | ENAIAEL28385                   | Bacteroidetes  | Cytophagales        | Cyclobacteriaceae             | <i>Cyclobacterium marinum</i> DSM745                                |
| 63 | ENAIAEL28386                   | Bacteroidetes  | Cytophagales        | Cyclobacteriaceae             | <i>Cyclobacterium marinum</i> DSM745                                |
| 64 | ENAIAFK04199                   | Bacteroidetes  | Cytophagales        | Cytophagaceae                 | <i>Emiticicia oligotrophica</i> DSM17448                            |
| 65 | ENAICCH53780                   | Bacteroidetes  | Cytophagales        | Cytophagaceae                 | <i>Fibrisoma limi</i> BUZ3                                          |

|     |               |                     |                       |                        |                                                        |
|-----|---------------|---------------------|-----------------------|------------------------|--------------------------------------------------------|
| 66  | ENAIADR23105  | Bacteroidetes       | Cytophagales          | Flammeovirgaceae       | <i>Marivirga tractuosa</i> DSM4126                     |
| 67  | ENAIAEA43205  | Bacteroidetes       | Flavobacteriales      | Cryomorphaceae         | <i>Fluvicicola taffensis</i> DSM16823                  |
| 68  | ENAIADV50039  | Bacteroidetes       | Flavobacteriales      | Flavobacteriaceae      | <i>Cellulophaga algicola</i> DSM14237                  |
| 69  | ENAIADV51026  | Bacteroidetes       | Flavobacteriales      | Flavobacteriaceae      | <i>Cellulophaga algicola</i> DSM14237                  |
| 70  | ENAIADY28100  | Bacteroidetes       | Flavobacteriales      | Flavobacteriaceae      | <i>Cellulophaga lytica</i> DSM7489                     |
| 71  | ENAIIEFK37022 | Bacteroidetes       | Flavobacteriales      | Flavobacteriaceae      | <i>Chryseobacterium gleum</i> ATCC35910                |
| 72  | ENAIIEW86730  | Bacteroidetes       | Flavobacteriales      | Flavobacteriaceae      | <i>Flavobacterium columnare</i> ATCC49512              |
| 73  | ENAIIEE19783  | Bacteroidetes       | Flavobacteriales      | Flavobacteriaceae      | <i>Krokinobacter</i> sp 4H-3-7-5                       |
| 74  | ENAIEM69324   | Bacteroidetes       | Flavobacteriales      | Flavobacteriaceae      | <i>Muricauda ruestringensis</i> DSM13258               |
| 75  | ENAIQA41320   | Bacteroidetes       | Flavobacteriales      | Flavobacteriaceae      | <i>Polaribacter</i> sp MED152                          |
| 76  | ENAIADQ82175  | Bacteroidetes       | Flavobacteriales      | Flavobacteriaceae      | <i>Riemerellaanati pestifer</i> ATCC11845              |
| 77  | ENAIACCF99636 | Bacteroidetes       | Flavobacteriales      | Flavobacteriaceae      | <i>Flavobacteriia bacterium</i>                        |
| 78  | ENAIACBH25587 | Bacteroidetes       | Incertaesedis(II)     | Rhodothermaceae        | <i>Salinibacter ruber</i> M8                           |
| 79  | ENAIIEE48088  | Bacteroidetes       | Sphingobacteriales    | Saprosiraceae          | <i>Haliscomenobacte rhydhrossis</i> DSM1100            |
| 80  | ENAIIEE49081  | Bacteroidetes       | Sphingobacteriales    | Saprosiraceae          | <i>Haliscomenobacte rhydhrossis</i> DSM1100            |
| 81  | ENAI AFC23630 | Bacteroidetes       | Sphingobacteriales    | Saprosiraceae          | <i>Saprosira grandis</i>                               |
| 82  | ENAI AFZ31505 | Cyanobacteria       | Chroococcales         | Gloeocapsa             | <i>Gloeocapsa</i> sp PCC7428                           |
| 83  | ENAI AFZ33354 | Cyanobacteria       | Chroococcales         | Gloeocapsa             | <i>Gloeocapsa</i> sp PCC7428                           |
| 84  | ENAI AFZ44148 | Cyanobacteria       | Chroococcales         | Halotheccluster        | <i>Halotheca</i> sp PCC7418A                           |
| 85  | ENAI ABD00626 | Cyanobacteria       | Chroococcales         | Synechococcus          | <i>Synechococcus</i> sp JA-3-3Ab                       |
| 86  | ENAI ABD01669 | Cyanobacteria       | Chroococcales         | Synechococcus          | <i>Synechococcus</i> sp JA-3-3Ab                       |
| 87  | ENAI AFZ57827 | Cyanobacteria       | Nostocales            | Nostocaceae            | <i>Anabaena cylindrica</i> PCC7122                     |
| 88  | ENAI ABA21870 | Cyanobacteria       | Nostocales            | Nostocaceae            | <i>Anabaena variabilis</i> ATCC 29413                  |
| 89  | ENAI ABA22311 | Cyanobacteria       | Nostocales            | Nostocaceae            | <i>Anabaena variabilis</i> ATCC 29413                  |
| 90  | ENAI ABA23729 | Cyanobacteria       | Nostocales            | Nostocaceae            | <i>Anabaena variabilis</i> ATCC 29413                  |
| 91  | ENAI ACC82149 | Cyanobacteria       | Nostocales            | Nostocaceae            | <i>Nostoc punctiforme</i> PCC73102                     |
| 92  | ENAI AFY41332 | Cyanobacteria       | Nostocales            | Nostocaceae            | <i>Nostoc</i> sp PCC7107                               |
| 93  | ENAI AFY43518 | Cyanobacteria       | Nostocales            | Nostocaceae            | <i>Nostoc</i> sp PCC7107                               |
| 94  | ENAI BA000019 | Cyanobacteria       | Nostocales            | Nostocaceae            | <i>Nostoc</i> sp PCC7120                               |
| 95  | ENAI BAB76675 | Cyanobacteria       | Nostocales            | Nostocaceae            | <i>Nostoc</i> sp PCC7120                               |
| 96  | ENAI BAB77731 | Cyanobacteria       | Nostocales            | Nostocaceae            | <i>Nostoc</i> sp PCC7120                               |
| 97  | ENAI AFY49531 | Cyanobacteria       | Nostocales            | Nostocaceae            | <i>Nostoc</i> sp PCC7524                               |
| 98  | ENAI AFZ03230 | Cyanobacteria       | Nostocales            | Rivulariaceae          | <i>Calothrix</i> sp PCC6303                            |
| 99  | ENAI AFY52909 | Cyanobacteria       | Nostocales            | Rivulariaceae          | <i>Rivularia</i> sp PCC7116                            |
| 100 | ENAI AFZ20635 | Cyanobacteria       | Oscillatoriales       | Microcoleus            | <i>Microcoleus</i> sp PCC7113                          |
| 101 | ENAI ACK70604 | Cyanobacteria       | Oscillatoriophycideae | Chroococcales          | <i>Cyanotheca</i> sp PCC-7424                          |
| 102 | ENAI AFY86481 | Cyanobacteria       | Pleurocapsales        | Chroococcidiopsis      | <i>Chroococcidiopsis thermalis</i> PCC7203             |
| 103 | ENAI AFY90141 | Cyanobacteria       | Pleurocapsales        | Chroococcidiopsis      | <i>Chroococcidiopsis thermalis</i> PCC7203             |
| 104 | ENAI ADY27657 | Deinococcus-Thermus | Deinococcales         | Deinococcaceae         | <i>Deinococcus proteolyticus</i>                       |
| 105 | ENAI ADH62171 | Deinococcus-Thermus | Thermales             | Thermaceae             | <i>Meiothermus silvanus</i> DSM9946                    |
| 106 | ENAI AFZ89285 | Firmicutes          | Bacillales            | Bacillaceae            | <i>Bacillus amyloliquefaciens</i> subsp plantarum AS43 |
| 107 | ENAI AEB22432 | Firmicutes          | Bacillales            | Bacillaceae            | <i>Bacillus amyloliquefaciens</i> TA208                |
| 108 | ENAI ADP34908 | Firmicutes          | Bacillales            | Bacillaceae            | <i>Bacillus atrophaeus</i> 1942                        |
| 109 | ENAI AAU39240 | Firmicutes          | Bacillales            | Bacillaceae            | <i>Bacillus licheniformis</i> DSM13                    |
| 110 | ENAI ADE72073 | Firmicutes          | Bacillales            | Bacillaceae            | <i>Bacillus megaterium</i> QMB1551                     |
| 111 | ENAI AEN87067 | Firmicutes          | Bacillales            | Bacillaceae            | <i>Bacillus megaterium</i> WSH-002                     |
| 112 | ENAI AFI26806 | Firmicutes          | Bacillales            | Bacillaceae            | <i>Bacillus</i> sp JS                                  |
| 113 | ENAI EKV74755 | Firmicutes          | Bacillales            | Bacillaceae            | <i>Bacillus</i> sp.2 A 57 CT2                          |
| 114 | ENAI ADV95192 | Firmicutes          | Bacillales            | Bacillaceae            | <i>Bacillus subtilis</i> BSn5                          |
| 115 | ENAI ADM36326 | Firmicutes          | Bacillales            | Bacillaceae            | <i>Bacillus subtilis</i> subsp spizizenii str W23      |
| 116 | ENAI AEP85178 | Firmicutes          | Bacillales            | Bacillaceae            | <i>Bacillus subtilis</i> subsp spizizenii TU-B-10      |
| 117 | ENAI AFH59845 | Firmicutes          | Bacillales            | Paenibacillaceae       | <i>Paenibacillus mucilaginosus</i> K02                 |
| 118 | ENAI EGK13909 | Firmicutes          | Bacillales            | Thermoactinomycetaceae | <i>Desmospora</i> sp 8437                              |
| 119 | ENAI ABH40216 | Gemmatimonadetes    | Gemmatimonadales      | Gemmatimonadaceae      | <i>Gemmatimonas aurantiaca</i>                         |
| 120 | ENAI AFH49936 | Ignavibacteriae     | Ignavibacteriales     | Ignavibacteriaceae     | <i>Ignavibacterium album</i> JCM16511                  |
| 121 | ENAI ADV63779 | Planctomycetes      | Planctomycetales      | Planctomycetaceae      | <i>Isosphaera pallida</i> ATCC43644                    |
| 122 | ENAI ADY59064 | Planctomycetes      | Planctomycetales      | Planctomycetaceae      | <i>Planctomyces brasiliensis</i> DSM5305               |
| 123 | ENAI ADY61457 | Planctomycetes      | Planctomycetales      | Planctomycetaceae      | <i>Planctomyces brasiliensis</i> DSM5305               |
| 124 | ENAI ADY61880 | Planctomycetes      | Planctomycetales      | Planctomycetaceae      | <i>Planctomyces brasiliensis</i> DSM5305               |
| 125 | ENAI AFS38873 | Proteobacteria      | Alteromonadales       | Alteromonadaceae       | <i>Alteromonas macleodi</i> iATCC27126                 |
| 126 | ENAI AEA99704 | Proteobacteria      | Alteromonadales       | Alteromonadaceae       | <i>Alteromonas macleodii</i>                           |
| 127 | ENAI AFT76084 | Proteobacteria      | Alteromonadales       | Alteromonadaceae       | <i>Alteromonas macleodii</i>                           |
| 128 | ENAI AFT79860 | Proteobacteria      | Alteromonadales       | Alteromonadaceae       | <i>Alteromonas macleodii</i>                           |
| 129 | ENAI AEF05323 | Proteobacteria      | Alteromonadales       | Alteromonadaceae       | <i>Alteromonas</i> sp SN2                              |
| 130 | ENAI GAC17848 | Proteobacteria      | Alteromonadales       | Alteromonadaceae       | <i>Glacielcola arctica</i> BSs20135                    |
| 131 | ENAI GAC21094 | Proteobacteria      | Alteromonadales       | Alteromonadaceae       | <i>Glacielcola arctica</i> BSs20135                    |
| 132 | ENAI GAC22211 | Proteobacteria      | Alteromonadales       | Alteromonadaceae       | <i>Glacielcola arctica</i> BSs20135                    |
| 133 | ENAI GAC26248 | Proteobacteria      | Alteromonadales       | Alteromonadaceae       | <i>Glacielcola mesophila</i> KMM241                    |
| 134 | ENAI GAC26997 | Proteobacteria      | Alteromonadales       | Alteromonadaceae       | <i>Glacielcola pallidula</i> DSM14239                  |
| 135 | ENAI GAC29575 | Proteobacteria      | Alteromonadales       | Alteromonadaceae       | <i>Glacielcola pallidula</i> DSM14239                  |
| 136 | ENAI GAC30922 | Proteobacteria      | Alteromonadales       | Alteromonadaceae       | <i>Glacielcola pallidula</i> DSM14239                  |
| 137 | ENAI GAC33715 | Proteobacteria      | Alteromonadales       | Alteromonadaceae       | <i>Glacielcola polaris</i> LMG21857                    |
| 138 | ENAI GAC38437 | Proteobacteria      | Alteromonadales       | Alteromonadaceae       | <i>Glacielcola psychrophila</i> 170                    |
| 139 | ENAI GAB56614 | Proteobacteria      | Alteromonadales       | Alteromonadaceae       | <i>Glacielcola punicea</i> DSM14233                    |

|     |               |                |                     |                        |                                                                         |
|-----|---------------|----------------|---------------------|------------------------|-------------------------------------------------------------------------|
| 140 | ENAICCG96968  | Proteobacteria | Alteromonadales     | Alteromonadaceae       | <i>Marinobacter hydrocarbonoclasticus</i> ATCC49840                     |
| 141 | ENAIDN76004   | Proteobacteria | Alteromonadales     | Ferrimonadaceae        | <i>Ferrimonas balearica</i> DSM9799                                     |
| 142 | ENAIGAA62951  | Proteobacteria | Alteromonadales     | Pseudoalteromonadaceae | <i>Pseudoalteromonas</i> sp BSi20311                                    |
| 143 | ENAIGAA66449  | Proteobacteria | Alteromonadales     | Pseudoalteromonadaceae | <i>Pseudoalteromonas</i> sp BSi20429                                    |
| 144 | ENAIGAA69043  | Proteobacteria | Alteromonadales     | Pseudoalteromonadaceae | <i>Pseudoalteromonas</i> sp BSi20429                                    |
| 145 | ENAIGAA73690  | Proteobacteria | Alteromonadales     | Pseudoalteromonadaceae | <i>Pseudoalteromonas</i> sp BSi20480                                    |
| 146 | ENAIGAA80269  | Proteobacteria | Alteromonadales     | Pseudoalteromonadaceae | <i>Pseudoalteromonas</i> sp BSi20495                                    |
| 147 | ENAIGAA81571  | Proteobacteria | Alteromonadales     | Pseudoalteromonadaceae | <i>Pseudoalteromonas</i> sp BSi20495                                    |
| 148 | ENAIGAA61442  | Proteobacteria | Alteromonadales     | Pseudoalteromonadaceae | <i>Pseudoalteromonas</i> sp BSi20652                                    |
| 149 | ENAIDT68141   | Proteobacteria | Alteromonadales     | Pseudoalteromonadaceae | <i>Pseudoalteromonas</i> sp SM9913                                      |
| 150 | ENAIBS09779   | Proteobacteria | Alteromonadales     | Shewanellaceae         | <i>Shewanella baltica</i> OS185                                         |
| 151 | ENAIBI73423   | Proteobacteria | Alteromonadales     | Shewanellaceae         | <i>Shewanella frigidimarina</i> NCIMB 400                               |
| 152 | ENAIBZ75449   | Proteobacteria | Alteromonadales     | Shewanellaceae         | <i>Shewanella halifaxensis</i> HAW-EB4                                  |
| 153 | ENAIBV86147   | Proteobacteria | Alteromonadales     | Shewanellaceae         | <i>Shewanella pealeana</i> ATCC 700345                                  |
| 154 | ENAIBO22704   | Proteobacteria | Alteromonadales     | Shewanellaceae         | <i>Shewanellalaloiha</i> PV-4                                           |
| 155 | ENAICA85252   | Proteobacteria | Alteromonadales     | Shewanellaceae         | <i>Shewanellawoodyi</i> ATCC 51908                                      |
| 156 | ENAIAET91953  | Proteobacteria | Burkholderiales     | Burkholderiaceae       | <i>Burkholderia</i> sp YI23                                             |
| 157 | ENAIBF09460   | Proteobacteria | Burkholderiales     | Burkholderiaceae       | <i>Cupriavidus metallidurans</i> CH3                                    |
| 158 | ENAIAEI79776  | Proteobacteria | Burkholderiales     | Burkholderiaceae       | <i>Cupriavidus necator</i> N-1                                          |
| 159 | ENAIFU45370   | Proteobacteria | Burkholderiales     | Comamonadaceae         | <i>Acidovorax</i> sp KKS102                                             |
| 160 | ENAICY34046   | Proteobacteria | Burkholderiales     | Comamonadaceae         | <i>Comamonas testosteroni</i>                                           |
| 161 | ENAICY34739   | Proteobacteria | Burkholderiales     | Comamonadaceae         | <i>Comamonas testosteroni</i>                                           |
| 162 | ENAIBX34995   | Proteobacteria | Burkholderiales     | Comamonadaceae         | <i>Delftia acidovorans</i> SPH-1                                        |
| 163 | ENAIBM36524   | Proteobacteria | Burkholderiales     | Comamonadaceae         | <i>Polaromonas naphthalenivorans</i> CJ2                                |
| 164 | ENAIAEK63472  | Proteobacteria | Burkholderiales     | Oxalobacteraceae       | <i>Collimonas fungivorans</i> Ter331                                    |
| 165 | ENAIAEK63890  | Proteobacteria | Burkholderiales     | Oxalobacteraceae       | <i>Collimonas fungivorans</i> Ter331                                    |
| 166 | ENAIEDX79900  | Proteobacteria | Caulobacterales     | Caulobacteraceae       | <i>Brevundimonas</i> sp BAL3                                            |
| 167 | ENAIEDX80389  | Proteobacteria | Caulobacterales     | Caulobacteraceae       | <i>Brevundimonas</i> sp BAL3                                            |
| 168 | ENAIEDX81672  | Proteobacteria | Caulobacterales     | Caulobacteraceae       | <i>Brevundimonas</i> sp BAL3                                            |
| 169 | ENAIAAK22442  | Proteobacteria | Caulobacterales     | Caulobacteraceae       | <i>Caulobacter crescentus</i> CB15                                      |
| 170 | ENAIAAK23544  | Proteobacteria | Caulobacterales     | Caulobacteraceae       | <i>Caulobacter crescentus</i> CB15                                      |
| 171 | ENAICG78853   | Proteobacteria | Caulobacterales     | Caulobacteraceae       | <i>Phenylobacterium zucineum</i> HLK1                                   |
| 172 | ENAIEGM78671  | Proteobacteria | Chromatiales        | Chromatiaceae          | <i>Rheinheimera</i> sp A13                                              |
| 173 | ENAIEED33300  | Proteobacteria | Gammaproteobacteria | Gammaproteobacteria    | <i>gammaproteobacterium</i> NOR5                                        |
| 174 | ENAIEED35601  | Proteobacteria | Gammaproteobacteria | Gammaproteobacteria    | <i>gammaproteobacterium</i> NOR51                                       |
| 175 | ENAIEKO36824  | Proteobacteria | Gammaproteobacteria | Gammaproteobacteria    | <i>SAR86clusterbacterium</i>                                            |
| 176 | ENAIEKO37313  | Proteobacteria | Gammaproteobacteria | Gammaproteobacteria    | <i>SAR86clusterbacterium</i>                                            |
| 177 | ENAIAEG01366  | Proteobacteria | Methylococcales     | Methylococcaceae       | <i>Methylomonas methanica</i> MC09                                      |
| 178 | ENAIAEI62293  | Proteobacteria | Myxococcales        | Myxococcaceae          | <i>Myxococcus fulvus</i> HW-1                                           |
| 179 | ENAIAAGC45053 | Proteobacteria | Myxococcales        | Myxococcaceae          | <i>Myxococcus stipitatus</i> DSM14675                                   |
| 180 | ENAIAAQ61942  | Proteobacteria | Neisseriales        | Neisseriaceae          | <i>Chromobacterium violaceum</i> ATCC 12472                             |
| 181 | ENAIEDX89406  | Proteobacteria | Oceanospirillales   | Alcanivoracaceae       | <i>Alcanivorax</i> sp DG881                                             |
| 182 | ENAIEDX91210  | Proteobacteria | Oceanospirillales   | Alcanivoracaceae       | <i>Alcanivorax</i> sp DG881                                             |
| 183 | ENAIAABC28066 | Proteobacteria | Oceanospirillales   | Hahellaceae            | <i>Hahella chejuensis</i> KCTC 2396                                     |
| 184 | ENAIAABC31544 | Proteobacteria | Oceanospirillales   | Hahellaceae            | <i>Hahella chejuensis</i> KCTC 2396                                     |
| 185 | ENAIABE60068  | Proteobacteria | Oceanospirillales   | Halomonadaceae         | <i>Chromohalobacter salexigens</i> DSM3043                              |
| 186 | ENAICBV42268  | Proteobacteria | Oceanospirillales   | Halomonadaceae         | <i>Halomonas elongata</i> DSM2581                                       |
| 187 | ENAIEEB78901  | Proteobacteria | OMGgroup            | OM60clade              | <i>Gammaproteobacteria</i>                                              |
| 188 | ENAIAAJ56861  | Proteobacteria | Pseudomonadales     | Moraxellaceae          | <i>Acinetobacter baumannii</i> AB307-0294                               |
| 189 | ENAIEKU56649  | Proteobacteria | Pseudomonadales     | Moraxellaceae          | <i>Acinetobacter baumannii</i> WC-323                                   |
| 190 | ENAIAID89668  | Proteobacteria | Pseudomonadales     | Moraxellaceae          | <i>Acinetobacter oleivorans</i> DR1                                     |
| 191 | ENAIELW83481  | Proteobacteria | Pseudomonadales     | Moraxellaceae          | <i>Acinetobacter</i> sp WC-743                                          |
| 192 | ENAIAAO77444  | Proteobacteria | Pseudomonadales     | Pseudomonadaceae       | <i>Azotobacte rvinelandii</i>                                           |
| 193 | ENAIABR86870  | Proteobacteria | Pseudomonadales     | Pseudomonadaceae       | <i>Pseudomonas aeruginosa</i> Pa7                                       |
| 194 | ENAIABJ13183  | Proteobacteria | Pseudomonadales     | Pseudomonadaceae       | <i>Pseudomonas aeruginosa</i> UCBPP-PA14                                |
| 195 | ENAIEKG33501  | Proteobacteria | Pseudomonadales     | Pseudomonadaceae       | <i>Pseudomonas avellanae</i> BPIC631                                    |
| 196 | ENAIAEA66958  | Proteobacteria | Pseudomonadales     | Pseudomonadaceae       | <i>Pseudomonas brassicacearum</i> subsp<br><i>brassicacearum</i> NFM421 |
| 197 | ENAIEIM16116  | Proteobacteria | Pseudomonadales     | Pseudomonadaceae       | <i>Pseudomonas chlororaphis</i> O6                                      |
| 198 | ENAIEJL08915  | Proteobacteria | Pseudomonadales     | Pseudomonadaceae       | <i>Pseudomonas chlororaphis</i> subsp <i>aureofaciens</i> 30-84         |
| 199 | ENAIAFJ58882  | Proteobacteria | Pseudomonadales     | Pseudomonadaceae       | <i>Pseudomonas fluorescens</i> A506                                     |
| 200 | ENAIAFJ59388  | Proteobacteria | Pseudomonadales     | Pseudomonadaceae       | <i>Pseudomonas fluorescens</i> A506                                     |
| 201 | ENAIAEV60917  | Proteobacteria | Pseudomonadales     | Pseudomonadaceae       | <i>Pseudomonas fluorescens</i> F113                                     |
| 202 | ENAIABA72539  | Proteobacteria | Pseudomonadales     | Pseudomonadaceae       | <i>Pseudomonas fluorescens</i> Pf0-1                                    |
| 203 | ENAIEJL02148  | Proteobacteria | Pseudomonadales     | Pseudomonadaceae       | <i>Pseudomonas fluorescens</i> Q2-87                                    |
| 204 | ENAIEJL02239  | Proteobacteria | Pseudomonadales     | Pseudomonadaceae       | <i>Pseudomonas fluorescens</i> Q2-87                                    |
| 205 | ENAIEIK70479  | Proteobacteria | Pseudomonadales     | Pseudomonadaceae       | <i>Pseudomonas fluorescens</i> Q8r1-96                                  |
| 206 | ENAIEJZ59901  | Proteobacteria | Pseudomonadales     | Pseudomonadaceae       | <i>Pseudomonas fluorescens</i> R124                                     |
| 207 | ENAIEIK62268  | Proteobacteria | Pseudomonadales     | Pseudomonadaceae       | <i>Pseudomonas fluorescens</i> SS101                                    |
| 208 | ENAIEIK63248  | Proteobacteria | Pseudomonadales     | Pseudomonadaceae       | <i>Pseudomonas fluorescens</i> SS101                                    |
| 209 | ENAIEFQ64408  | Proteobacteria | Pseudomonadales     | Pseudomonadaceae       | <i>Pseudomonas fluorescens</i> WH6                                      |
| 210 | ENAIAAGE25180 | Proteobacteria | Pseudomonadales     | Pseudomonadaceae       | <i>Pseudomonas poae</i> RE 1-1-1                                        |
| 211 | ENAIAAGE24246 | Proteobacteria | Pseudomonadales     | Pseudomonadaceae       | <i>Pseudomonas poae</i> RE 1-1-14                                       |

|     |                                |                |                  |                     |                                                              |
|-----|--------------------------------|----------------|------------------|---------------------|--------------------------------------------------------------|
| 212 | ENAIAAY96259                   | Proteobacteria | Pseudomonadales  | Pseudomonadaceae    | <i>Pseudomonas protegens</i> Pf-5                            |
| 213 | ENAIEJL99162                   | Proteobacteria | Pseudomonadales  | Pseudomonadaceae    | <i>Pseudomonas</i> sp GM16                                   |
| 214 | ENAIEJM03283                   | Proteobacteria | Pseudomonadales  | Pseudomonadaceae    | <i>Pseudomonas</i> sp GM17                                   |
| 215 | ENAIEJM13129                   | Proteobacteria | Pseudomonadales  | Pseudomonadaceae    | <i>Pseudomonas</i> sp GM18                                   |
| 216 | ENAIEJM17528                   | Proteobacteria | Pseudomonadales  | Pseudomonadaceae    | <i>Pseudomonas</i> sp GM18                                   |
| 217 | ENAIEJM36045                   | Proteobacteria | Pseudomonadales  | Pseudomonadaceae    | <i>Pseudomonas</i> sp GM30                                   |
| 218 | ENAIEJM35897                   | Proteobacteria | Pseudomonadales  | Pseudomonadaceae    | <i>Pseudomonas</i> sp GM33                                   |
| 219 | ENAIEJM54628                   | Proteobacteria | Pseudomonadales  | Pseudomonadaceae    | <i>Pseudomonas</i> sp GM41                                   |
| 220 | ENAIEJM61630                   | Proteobacteria | Pseudomonadales  | Pseudomonadaceae    | <i>Pseudomonas</i> sp GM48                                   |
| 221 | ENAIEJM58181                   | Proteobacteria | Pseudomonadales  | Pseudomonadaceae    | <i>Pseudomonas</i> sp GM49                                   |
| 222 | ENAIAFY17601                   | Proteobacteria | Pseudomonadales  | Pseudomonadaceae    | <i>Pseudomonas</i> sp UW4                                    |
| 223 | ENAIAFY17929                   | Proteobacteria | Pseudomonadales  | Pseudomonadaceae    | <i>Pseudomonas</i> sp UW4                                    |
| 224 | ENAIEJM65063                   | Proteobacteria | Pseudomonadales  | Pseudomonadaceae    | <i>Pseudomonas</i> sp.GM50                                   |
| 225 | ENAIEJM70909                   | Proteobacteria | Pseudomonadales  | Pseudomonadaceae    | <i>Pseudomonas</i> sp.GM55                                   |
| 226 | ENAIEJM91030                   | Proteobacteria | Pseudomonadales  | Pseudomonadaceae    | <i>Pseudomonas</i> sp.GM74                                   |
| 227 | ENAIEJN29832                   | Proteobacteria | Pseudomonadales  | Pseudomonadaceae    | <i>Pseudomonas</i> sp.GM78                                   |
| 228 | ENAIEJN25826                   | Proteobacteria | Pseudomonadales  | Pseudomonadaceae    | <i>Pseudomonas</i> sp.GM79                                   |
| 229 | ENAIEJN25122                   | Proteobacteria | Pseudomonadales  | Pseudomonadaceae    | <i>Pseudomonas</i> sp.GM80                                   |
| 230 | ENAIAFM31860                   | Proteobacteria | Pseudomonadales  | Pseudomonadaceae    | <i>Pseudomonas stutzer</i> iCCUG 29243                       |
| 231 | ENAIBP81306                    | Proteobacteria | Pseudomonadales  | Pseudomonadaceae    | <i>Pseudomonas stutzeri</i> A1501                            |
| 232 | ENAIGA85265                    | Proteobacteria | Pseudomonadales  | Pseudomonadaceae    | <i>Pseudomonas stutzeri</i> RCH2                             |
| 233 | ENAIEIK67779                   | Proteobacteria | Pseudomonadales  | Pseudomonadaceae    | <i>Pseudomonas synxantha</i> BG33R                           |
| 234 | ENAIEIK68182                   | Proteobacteria | Pseudomonadales  | Pseudomonadaceae    | <i>Pseudomonas synxantha</i> BG33R                           |
| 235 | ENAIELS44484                   | Proteobacteria | Pseudomonadales  | Pseudomonadaceae    | <i>Pseudomonas syringae</i> B64                              |
| 236 | ENAIAAO54543                   | Proteobacteria | Pseudomonadales  | Pseudomonadaceae    | <i>Pseudomonas syringae</i> DC3000                           |
| 237 | ENAIAAO57929                   | Proteobacteria | Pseudomonadales  | Pseudomonadaceae    | <i>Pseudomonas syringae</i> DC3000                           |
| 238 | ENAIEKG42923                   | Proteobacteria | Pseudomonadales  | Pseudomonadaceae    | <i>Pseudomonas syringae</i> pv <i>avellanae</i>              |
| 239 | ENAIAAZ36305                   | Proteobacteria | Pseudomonadales  | Pseudomonadaceae    | <i>Pseudomonas syringae</i> pv <i>phaseolicola</i> 1448A     |
| 240 | ENAIAAY39201                   | Proteobacteria | Pseudomonadales  | Pseudomonadaceae    | <i>Pseudomonas syringae</i> pv <i>syringae</i> B728a         |
| 241 | gil229587578:9107<br>75-912316 | Proteobacteria | Pseudomonadales  | Pseudomonadaceae    | <i>Pseudomonas fluorescens</i> SBW25                         |
| 242 | ENAIBCB95136                   | Proteobacteria | Rhizobiales      | Beijerinckiaceae    | <i>Beijerinckia indica</i> subsp <i>indica</i> ATCC 9039     |
| 243 | ENAIBAM86284                   | Proteobacteria | Rhizobiales      | Bradyrhizobiaceae   | <i>Agromonas oligotrophica</i> S58                           |
| 244 | ENAIBAC45799                   | Proteobacteria | Rhizobiales      | Bradyrhizobiaceae   | <i>Bradyrhizobium japonicum</i> USDA 110                     |
| 245 | ENAIBAC47873                   | Proteobacteria | Rhizobiales      | Bradyrhizobiaceae   | <i>Bradyrhizobium japonicum</i> USDA 110                     |
| 246 | ENAIBAL05805                   | Proteobacteria | Rhizobiales      | Bradyrhizobiaceae   | <i>Bradyrhizobium japonicum</i> USDA 6                       |
| 247 | ENAIBAL12444                   | Proteobacteria | Rhizobiales      | Bradyrhizobiaceae   | <i>Bradyrhizobium japonicum</i> USDA 6                       |
| 248 | ENAIBAQ32545                   | Proteobacteria | Rhizobiales      | Bradyrhizobiaceae   | <i>Bradyrhizobium</i> sp BTa1                                |
| 249 | ENAICAL74216                   | Proteobacteria | Rhizobiales      | Bradyrhizobiaceae   | <i>Bradyrhizobium</i> sp ORS278                              |
| 250 | ENAIBAL73521                   | Proteobacteria | Rhizobiales      | Bradyrhizobiaceae   | <i>Bradyrhizobium</i> sp S23321                              |
| 251 | ENAIBAL78551                   | Proteobacteria | Rhizobiales      | Bradyrhizobiaceae   | <i>Bradyrhizobium</i> sp S23321                              |
| 252 | ENAICAD75979                   | Proteobacteria | Rhizobiales      | Bradyrhizobiaceae   | <i>Rhodopseudomonas palustris</i> CGA009                     |
| 253 | ENAICAE29954                   | Proteobacteria | Rhizobiales      | Bradyrhizobiaceae   | <i>Rhodopseudomonas palustris</i> CGA009                     |
| 254 | ENAIBCB26602                   | Proteobacteria | Rhizobiales      | Methylobacteriaceae | <i>Methylobacterium radiotolerans</i> JCM2831                |
| 255 | ENAIDV10306                    | Proteobacteria | Rhizobiales      | Phyllobacteriaceae  | <i>Mesorhizobium ciceri</i> biovar <i>biserrulae</i> WSM1271 |
| 256 | ENAIBAB50851                   | Proteobacteria | Rhizobiales      | Phyllobacteriaceae  | <i>Mesorhizobium loti</i> MAFF303099                         |
| 257 | ENAIAEH85654                   | Proteobacteria | Rhizobiales      | Phyllobacteriaceae  | <i>Mesorhizobium opportunistum</i> WSM2075                   |
| 258 | ENAICM38012                    | Proteobacteria | Rhizobiales      | Rhizobiaceae        | <i>Agrobacterium vitis</i> S4                                |
| 259 | ENAICCF18951                   | Proteobacteria | Rhizobiales      | Rhizobiaceae        | <i>Rhizobium</i> sp                                          |
| 260 | ENAICCF22040                   | Proteobacteria | Rhizobiales      | Rhizobiaceae        | <i>Rhizobium</i> sp                                          |
| 261 | ENAICCE97714                   | Proteobacteria | Rhizobiales      | Rhizobiaceae        | <i>Sinorhizobium fredii</i> HH103                            |
| 262 | ENAICP26932                    | Proteobacteria | Rhizobiales      | Rhizobiaceae        | <i>Sinorhizobium fredii</i> NGR234                           |
| 263 | ENAIAFL49637                   | Proteobacteria | Rhizobiales      | Rhizobiaceae        | <i>Sinorhizobium fredii</i> USDA 257                         |
| 264 | ENAIAFL54121                   | Proteobacteria | Rhizobiales      | Rhizobiaceae        | <i>Sinorhizobium fredii</i> USDA 257                         |
| 265 | ENAIBR61806                    | Proteobacteria | Rhizobiales      | Rhizobiaceae        | <i>Sinorhizobium medicae</i> WSM419                          |
| 266 | ENAIAAC44219                   | Proteobacteria | Rhizobiales      | Rhizobiaceae        | <i>Sinorhizobium meliloti</i>                                |
| 267 | ENAIAEG05816                   | Proteobacteria | Rhizobiales      | Rhizobiaceae        | <i>Sinorhizobium meliloti</i> BL225C                         |
| 268 | ENAIEEB84921                   | Proteobacteria | Rhodobacterales  | Rhodobacteraceae    | <i>Roseobacter</i> sp GAI101                                 |
| 269 | ENAIAAV93580                   | Proteobacteria | Rhodobacterales  | Rhodobacteraceae    | <i>Ruegeria pomeroyi</i> DSS-3                               |
| 270 | ENAIEGY01290                   | Proteobacteria | Rhodospirillales | Rhodospirillaceae   | <i>Azospirillum amazonense</i> Y2                            |
| 271 | ENAIAIC97695                   | Proteobacteria | Rhodospirillales | Rhodospirillaceae   | <i>Rhodospirillum centenum</i>                               |
| 272 | ENAIAIC99776                   | Proteobacteria | Rhodospirillales | Rhodospirillaceae   | <i>Rhodospirillum centenum</i>                               |
| 273 | ENAIAICJ01381                  | Proteobacteria | Rhodospirillales | Rhodospirillaceae   | <i>Rhodospirillum centenum</i>                               |
| 274 | ENAIBCB62284                   | Proteobacteria | Sphingomonadales | Erythrobacteraceae  | <i>Erythrobacter litoralis</i> HTCC2594                      |
| 275 | ENAIBCB62554                   | Proteobacteria | Sphingomonadales | Erythrobacteraceae  | <i>Erythrobacter litoralis</i> HTCC2594                      |
| 276 | ENAIBCB64568                   | Proteobacteria | Sphingomonadales | Erythrobacteraceae  | <i>Erythrobacter litoralis</i> HTCC2594                      |
| 277 | ENAIEGI55870                   | Proteobacteria | Sphingomonadales | Sphingomonadaceae   | <i>Sphingomonas</i> sp S17                                   |
| 278 | ENAIAAA74034                   | Proteobacteria | Sphingomonadales | Sphingomonadaceae   | <i>Zymomonas mobilis</i>                                     |
| 279 | ENAIGAA04411                   | Proteobacteria | Vibrionales      | Vibrionaceae        | <i>Photobacterium leiognathi</i> subsp <i>mandapamensis</i>  |
| 280 | ENAIBU71003                    | Proteobacteria | Vibrionales      | Vibrionaceae        | <i>Vibrio harveyi</i> ATCC BAA-1116                          |
| 281 | ENAIAEX21711                   | Proteobacteria | Vibrionales      | Vibrionaceae        | <i>Vibrio</i> sp EJY3                                        |
| 282 | ENAIEKM14503                   | Proteobacteria | Vibrionales      | Vibrionaceae        | <i>Vibrio</i> sp HENC-01                                     |
| 283 | ENAIEKM25196                   | Proteobacteria | Vibrionales      | Vibrionaceae        | <i>Vibrio</i> sp HENC-03                                     |
| 284 | ENAIEKM27698                   | Proteobacteria | Vibrionales      | Vibrionaceae        | <i>Vibrio</i> sp HENC-03                                     |

|     |                                  |                 |                    |                    |                                                            |
|-----|----------------------------------|-----------------|--------------------|--------------------|------------------------------------------------------------|
| 285 | ENAI AER57490                    | Proteobacteria  | Xanthomonadales    | Xanthomonadaceae   | <i>Pseudoxanthomonas spadix</i> BD-a59                     |
| 286 | ENAI EED38117                    | Proteobacteria  | Xanthomonadales    | Xanthomonadaceae   | <i>Stenotrophomonas</i> sp SKA14                           |
| 287 | ENAI EED38217                    | Proteobacteria  | Xanthomonadales    | Xanthomonadaceae   | <i>Stenotrophomonas</i> sp SKA14                           |
| 288 | ENAI AGH79580                    | Proteobacteria  | Xanthomonadales    | Xanthomonadaceae   | <i>Xanthomonas axonopodis</i>                              |
| 289 | ENAI AAM39002                    | Proteobacteria  | Xanthomonadales    | Xanthomonadaceae   | <i>Xanthomonas axonopodis</i> pv citri str 306             |
| 290 | ENAI AEO44275                    | Proteobacteria  | Xanthomonadales    | Xanthomonadaceae   | <i>Xanthomonas axonopodis</i> pv citrumeloF1               |
| 291 | ENAI AEO44276                    | Proteobacteria  | Xanthomonadales    | Xanthomonadaceae   | <i>Xanthomonas axonopodis</i> pv citrumeloF1               |
| 292 | ENAI AAM43263                    | Proteobacteria  | Xanthomonadales    | Xanthomonadaceae   | <i>Xanthomonas campestris</i> pv campestris str ATCC 33913 |
| 293 | gil188989396:4797<br>111-4798703 | Proteobacteria  | Xanthomonadales    | Xanthomonadaceae   | <i>Xanthomonas campestris</i> pv campestris str B100       |
| 294 | ENAI AEL05146                    | Proteobacteria  | Xanthomonadales    | Xanthomonadaceae   | <i>Xanthomonas campestris</i> pv raphani756C               |
| 295 | ENAI AP008229                    | Proteobacteria  | Xanthomonadales    | Xanthomonadaceae   | <i>Xanthomonas oryzae</i> pv oryzae MAFF311018             |
| 296 | ENAI AAW77808                    | Proteobacteria  | Xanthomonadales    | Xanthomonadaceae   | <i>Xanthomonas oryzae</i> pv oryzae KACC 10331             |
| 297 | ENAI AAW77809                    | Proteobacteria  | Xanthomonadales    | Xanthomonadaceae   | <i>Xanthomonas oryzae</i> pv oryzae KACC 10331             |
| 298 | ENAI AFM12794                    | Spirochaetes    | Leptospiraceae     | Leptospiraceae     | <i>Turneriella parva</i> DSM21527                          |
| 299 | ENAI EJO78772                    | Spirochaetes    | Spirochaetales     | Leptospiraceae     | <i>Leptospira ainterrogans</i> str LC82-25                 |
| 300 | ENAI EMY77397                    | Spirochaetes    | Spirochaetales     | Leptospiraceae     | <i>Leptospir aweilii</i> str ICFT                          |
| 301 | ENAI EMJ98172                    | Spirochaetes    | Spirochaetales     | Leptospiraceae     | <i>Leptospira alstoni</i> serovar Sichuan str 79601        |
| 302 | ENAI EKR99493                    | Spirochaetes    | Spirochaetales     | Leptospiraceae     | <i>Leptospira borgpetersenii</i> str 200901122             |
| 303 | ENAI EMO55272                    | Spirochaetes    | Spirochaetales     | Leptospiraceae     | <i>Leptospira interrogans</i> str HAI1536                  |
| 304 | ENAI EJO69850                    | Spirochaetes    | Spirochaetales     | Leptospiraceae     | <i>Leptospira kirschneri</i> str RM52                      |
| 305 | ENAI EIE03159                    | Spirochaetes    | Spirochaetales     | Leptospiraceae     | <i>Leptospira licerasiae</i> str VAR010                    |
| 306 | ENAI EKJ85163                    | Spirochaetes    | Spirochaetales     | Leptospiraceae     | <i>Leptospira meyeri</i> serovar Hardjo str Went5          |
| 307 | ENAI EKR72005                    | Spirochaetes    | Spirochaetales     | Leptospiraceae     | <i>Leptospira noguchii</i> str 2006001870                  |
| 308 | ENAI EKO33638                    | Spirochaetes    | Spirochaetales     | Leptospiraceae     | <i>Leptospira santarosai</i> str MOR084                    |
| 309 | ENAI EMJ99961                    | Spirochaetes    | Spirochaetales     | Leptospiraceae     | <i>Leptospira</i> sp B5-022                                |
| 310 | ENAI EMY62309                    | Spirochaetes    | Spirochaetales     | Leptospiraceae     | <i>Leptospira terpstae</i> ATCC 700639                     |
| 311 | ENAI EMY70440                    | Spirochaetes    | Spirochaetales     | Leptospiraceae     | <i>Leptospira vanthielii</i> ATCC700522                    |
| 312 | ENAI EKR66269                    | Spirochaetes    | Spirochaetales     | Leptospiraceae     | <i>Leptospira weilii</i> str 2006001853                    |
| 313 | ENAI EKP12482                    | Spirochaetes    | Spirochaetales     | Leptospiraceae     | <i>Leptospira-borgpetersenii</i> -str-200801926            |
| 314 | ENAI EDY80641                    | Verrucomicrobia | Verrucomicrobiales | Verrucomicrobiales | <i>Verrucomicrobiae bacterium</i> DG1235                   |
| 315 | ENAI EDY82445                    | Verrucomicrobia | Verrucomicrobiales | Verrucomicrobiales | <i>Verrucomicrobiae bacterium</i> DG1235                   |

**TABLE S2:** Taxonomic summary showing the number of filtered reads at the phylum, class, order, family and genus levels in the samples S1-6 amplified by PHOD and ALPS primers.

|                            | Number of reads |     |     |     |     |     |      |     |    |    |    |    |
|----------------------------|-----------------|-----|-----|-----|-----|-----|------|-----|----|----|----|----|
|                            | PHOD            |     |     |     |     |     | ALPS |     |    |    |    |    |
|                            | S1              | S2  | S3  | S4  | S5  | S6  | S1   | S2  | S3 | S4 | S5 | S6 |
| Acidobacteria              | 38              | 0   | 0   | 0   | 70  | 0   | 0    | 0   | 0  | 0  | 0  | 0  |
| Acidobacteria              | 16              | 0   | 0   | 0   | 70  | 0   | 0    | 0   | 0  | 0  | 0  | 0  |
| Acidobacteria              | 16              | 0   | 0   | 0   | 70  | 0   | 0    | 0   | 0  | 0  | 0  | 0  |
| Acidobacteriaceae          | 16              | 0   | 0   | 0   | 70  | 0   | 0    | 0   | 0  | 0  | 0  | 0  |
| <i>Acidobacterium</i>      | 15              | 0   | 0   | 0   | 66  | 0   | 0    | 0   | 0  | 0  | 0  | 0  |
| <i>Granulicella</i>        | 1               | 0   | 0   | 0   | 4   | 0   | 0    | 0   | 0  | 0  | 0  | 0  |
| Solibacteres               | 7               | 0   | 0   | 0   | 0   | 0   | 1    | 0   | 1  | 0  | 0  | 0  |
| Solibacterales             | 7               | 0   | 0   | 0   | 0   | 0   | 1    | 0   | 1  | 0  | 0  | 0  |
| Solibacteraceae            | 7               | 0   | 0   | 0   | 0   | 0   | 1    | 0   | 1  | 0  | 0  | 0  |
| <i>Solibacter</i>          | 7               | 0   | 0   | 0   | 0   | 0   | 1    | 0   | 1  | 0  | 0  | 0  |
| Unclassified Acidobacteria | 15              | 0   | 0   | 0   | 0   | 0   | 0    | 0   | 0  | 0  | 0  | 0  |
| Actinobacteria             | 325             | 611 | 392 | 343 | 443 | 285 | 26   | 101 | 18 | 71 | 21 | 59 |
| Actinomycetales            | 307             | 598 | 388 | 331 | 440 | 285 | 26   | 93  | 18 | 39 | 15 | 59 |
| Actinoplanaceae            | 198             | 434 | 209 | 109 | 211 | 133 | 25   | 62  | 10 | 36 | 15 | 27 |
| <i>Actinoplanes</i>        | 106             | 198 | 3   | 0   | 24  | 11  | 0    | 0   | 0  | 0  | 1  | 3  |
| <i>Kitasatospora</i>       | 1               | 0   | 3   | 1   | 0   | 0   | 0    | 0   | 0  | 0  | 0  | 0  |
| <i>Micromonospora</i>      | 1               | 22  | 2   | 6   | 36  | 13  | 0    | 0   | 6  | 0  | 0  | 0  |
| <i>Microstreptospora</i>   | 26              | 12  | 61  | 0   | 44  | 16  | 0    | 3   | 0  | 5  | 0  | 9  |
| <i>Streptomyces</i>        | 64              | 201 | 127 | 102 | 94  | 93  | 25   | 59  | 4  | 31 | 14 | 15 |
| <i>Streptosporangium</i>   | 0               | 1   | 13  | 0   | 13  | 0   | 0    | 0   | 0  | 0  | 0  | 0  |
| Actinosynnemataceae        | 17              | 31  | 29  | 157 | 0   | 28  | 1    | 2   | 1  | 0  | 0  | 28 |
| <i>Actinomyces</i>         | 0               | 2   | 0   | 0   | 0   | 22  | 0    | 0   | 0  | 0  | 0  | 0  |
| <i>Amycolatopsis</i>       | 4               | 19  | 5   | 155 | 0   | 4   | 0    | 0   | 1  | 0  | 0  | 1  |
| <i>Kutzneria</i>           | 0               | 0   | 0   | 0   | 0   | 0   | 0    | 0   | 0  | 0  | 0  | 27 |
| <i>Saccharothrix</i>       | 13              | 10  | 20  | 2   | 0   | 2   | 0    | 2   | 0  | 0  | 0  | 0  |
| <i>Thermobispora</i>       | 0               | 0   | 4   | 0   | 0   | 0   | 1    | 0   | 0  | 0  | 0  | 0  |
| Beutenbergiaceae           | 6               | 5   | 0   | 0   | 28  | 48  | 0    | 0   | 0  | 0  | 0  | 0  |
| <i>Beutenbergia</i>        | 6               | 5   | 0   | 0   | 28  | 48  | 0    | 0   | 0  | 0  | 0  | 0  |
| Cellulomonadaceae          | 0               | 0   | 0   | 0   | 0   | 0   | 0    | 0   | 1  | 0  | 0  | 0  |
| <i>Cellulomonas</i>        | 0               | 0   | 0   | 0   | 0   | 0   | 0    | 0   | 1  | 0  | 0  | 0  |
| Corynebacteriaceae         | 0               | 0   | 0   | 0   | 0   | 0   | 0    | 0   | 0  | 0  | 0  | 0  |
| <i>Corynebacterium</i>     | 0               | 0   | 0   | 0   | 0   | 0   | 0    | 0   | 0  | 0  | 0  | 0  |
| Frankiaceae                | 14              | 0   | 62  | 2   | 34  | 0   | 0    | 0   | 0  | 0  | 0  | 1  |
| <i>Frankia</i>             | 14              | 0   | 62  | 2   | 34  | 0   | 0    | 0   | 0  | 0  | 0  | 1  |
| Geodermatophilaceae        | 0               | 0   | 0   | 0   | 0   | 0   | 0    | 0   | 1  | 1  | 0  | 1  |
| <i>Blastococcus</i>        | 0               | 0   | 0   | 0   | 0   | 0   | 0    | 0   | 0  | 1  | 0  | 0  |
| <i>Geodermatophilus</i>    | 0               | 0   | 0   | 0   | 0   | 0   | 0    | 0   | 1  | 0  | 0  | 0  |
| <i>Modestibacter</i>       | 0               | 0   | 0   | 0   | 0   | 0   | 0    | 0   | 0  | 0  | 0  | 1  |
| Glycomycetaceae            | 0               | 0   | 0   | 0   | 0   | 1   | 0    | 8   | 0  | 0  | 0  | 0  |
| <i>Stackebrandtia</i>      | 0               | 0   | 0   | 0   | 0   | 1   | 0    | 8   | 0  | 0  | 0  | 0  |
| Gordoniaceae               | 0               | 0   | 0   | 0   | 0   | 0   | 0    | 0   | 0  | 0  | 0  | 0  |
| <i>Gordana</i>             | 0               | 0   | 0   | 0   | 0   | 0   | 0    | 0   | 0  | 0  | 0  | 0  |
| Kineosporiaceae            | 7               | 13  | 5   | 3   | 32  | 11  | 0    | 0   | 0  | 0  | 0  | 0  |
| <i>Kineococcus</i>         | 7               | 13  | 5   | 3   | 32  | 11  | 0    | 0   | 0  | 0  | 0  | 0  |
| Micrococcaceae             | 6               | 15  | 40  | 25  | 2   | 2   | 0    | 0   | 0  | 0  | 0  | 0  |
| <i>Arthrobacter</i>        | 1               | 0   | 21  | 0   | 1   | 0   | 0    | 0   | 0  | 0  | 0  | 0  |
| <i>Micrococcus</i>         | 5               | 15  | 19  | 25  | 1   | 2   | 0    | 0   | 0  | 0  | 0  | 0  |
| Mycobacteriaceae           | 0               | 0   | 0   | 0   | 3   | 1   | 0    | 0   | 0  | 0  | 0  | 2  |
| <i>Mycobacterium</i>       | 0               | 0   | 0   | 0   | 3   | 1   | 0    | 0   | 0  | 0  | 0  | 2  |
| Nocardiaceae               | 0               | 5   | 0   | 0   | 0   | 0   | 0    | 0   | 0  | 0  | 0  | 0  |
| <i>Micropolyspora</i>      | 0               | 0   | 0   | 0   | 0   | 0   | 0    | 0   | 0  | 0  | 0  | 0  |
| <i>Rhodococcus</i>         | 0               | 5   | 0   | 0   | 0   | 0   | 0    | 0   | 0  | 0  | 0  | 0  |
| Nocardiodiaceae            | 59              | 87  | 34  | 35  | 127 | 61  | 0    | 14  | 5  | 0  | 0  | 0  |
| <i>Kribella</i>            | 59              | 87  | 28  | 34  | 126 | 61  | 0    | 14  | 5  | 0  | 0  | 0  |
| <i>Nocardia</i>            | 0               | 0   | 6   | 1   | 1   | 0   | 0    | 0   | 0  | 0  | 0  | 0  |
| Propionibacteriaceae       | 0               | 0   | 0   | 0   | 0   | 0   | 0    | 0   | 0  | 2  | 0  | 0  |
| <i>Microlunatus</i>        | 0               | 0   | 0   | 0   | 0   | 0   | 0    | 0   | 0  | 2  | 0  | 0  |
| Thermomonosporaceae        | 0               | 8   | 9   | 0   | 2   | 0   | 0    | 7   | 0  | 0  | 0  | 0  |
| <i>Thermomonospora</i>     | 0               | 8   | 9   | 0   | 2   | 0   | 0    | 7   | 0  | 0  | 0  | 0  |
| Tsukamurellaceae           | 0               | 0   | 0   | 0   | 1   | 0   | 0    | 0   | 0  | 0  | 0  | 0  |
| <i>Tsukamurella</i>        | 0               | 0   | 0   | 0   | 1   | 0   | 0    | 0   | 0  | 0  | 0  | 0  |
| Rubrobacterales            | 18              | 13  | 4   | 12  | 3   | 0   | 0    | 8   | 0  | 32 | 0  | 0  |

|                               |    |     |     |     |     |    |    |   |    |    |   |    |
|-------------------------------|----|-----|-----|-----|-----|----|----|---|----|----|---|----|
| Rubrobacteraceae              | 18 | 13  | 4   | 12  | 3   | 0  | 0  | 8 | 0  | 32 | 0 | 0  |
| <i>Rubrobacter</i>            | 18 | 13  | 4   | 12  | 3   | 0  | 0  | 8 | 0  | 32 | 0 | 0  |
| Solirubrobacteriales          | 0  | 0   | 0   | 0   | 0   | 0  | 0  | 0 | 0  | 0  | 6 | 0  |
| Conexibacteraceae             | 0  | 0   | 0   | 0   | 0   | 0  | 0  | 0 | 0  | 0  | 6 | 0  |
| <i>Conexibacter</i>           | 0  | 0   | 0   | 0   | 0   | 0  | 0  | 0 | 0  | 0  | 6 | 0  |
| Bacteroidetes                 | 0  | 0   | 0   | 1   | 4   | 0  | 2  | 3 | 0  | 0  | 0 | 0  |
| Sphingobacteriia              | 0  | 0   | 0   | 1   | 4   | 0  | 2  | 3 | 0  | 0  | 0 | 0  |
| Chitinophagaceae              | 0  | 0   | 0   | 1   | 4   | 0  | 2  | 3 | 0  | 0  | 0 | 0  |
| <i>Niastella</i>              | 0  | 0   | 0   | 1   | 4   | 0  | 2  | 3 | 0  | 0  | 0 | 0  |
| Chloroflexi                   | 4  | 0   | 6   | 0   | 0   | 0  | 0  | 2 | 9  | 0  | 0 | 0  |
| Chloroflexi                   | 2  | 0   | 6   | 0   | 0   | 0  | 0  | 1 | 0  | 0  | 0 | 0  |
| Chloroflexaceae               | 2  | 0   | 0   | 0   | 0   | 0  | 0  | 1 | 0  | 0  | 0 | 0  |
| Roseiflexaceae                | 2  | 0   | 0   | 0   | 0   | 0  | 0  | 1 | 0  | 0  | 0 | 0  |
| <i>Roseiflexus</i>            | 2  | 0   | 0   | 0   | 0   | 0  | 0  | 1 | 0  | 0  | 0 | 0  |
| Herpetosiphonales             | 0  | 0   | 6   | 0   | 0   | 0  | 0  | 0 | 0  | 0  | 0 | 0  |
| Herpetosiphonaceae            | 0  | 0   | 6   | 0   | 0   | 0  | 0  | 0 | 0  | 0  | 0 | 0  |
| <i>Herpetosiphon</i>          | 0  | 0   | 6   | 0   | 0   | 0  | 0  | 0 | 0  | 0  | 0 | 0  |
| Thermomicrobia                | 2  | 0   | 0   | 0   | 0   | 0  | 0  | 1 | 9  | 0  | 0 | 0  |
| Sphaerobacteriales            | 2  | 0   | 0   | 0   | 0   | 0  | 0  | 1 | 0  | 0  | 0 | 0  |
| Sphaerobacteraceae            | 2  | 0   | 0   | 0   | 0   | 0  | 0  | 1 | 0  | 0  | 0 | 0  |
| <i>Sphaerobacter</i>          | 2  | 0   | 0   | 0   | 0   | 0  | 0  | 1 | 0  | 0  | 0 | 0  |
| Cyanobacteria                 | 39 | 116 | 66  | 88  | 673 | 72 | 0  | 0 | 0  | 0  | 0 | 5  |
| Cyanophyceae                  | 0  | 6   | 47  | 6   | 43  | 0  | 0  | 0 | 0  | 0  | 0 | 0  |
| Chroococcales                 | 0  | 0   | 1   | 0   | 0   | 0  | 0  | 0 | 0  | 0  | 0 | 0  |
| Xenococcaceae                 | 0  | 0   | 1   | 0   | 0   | 0  | 0  | 0 | 0  | 0  | 0 | 0  |
| <i>Chroococcidiopsis</i>      | 0  | 0   | 0   | 0   | 0   | 0  | 0  | 0 | 0  | 0  | 0 | 0  |
| <i>Pleurocapsa</i>            | 0  | 0   | 1   | 0   | 0   | 0  | 0  | 0 | 0  | 0  | 0 | 0  |
| Nostocales                    | 0  | 6   | 46  | 6   | 43  | 0  | 0  | 0 | 0  | 0  | 0 | 0  |
| Nostocaceae                   | 0  | 6   | 46  | 6   | 43  | 0  | 0  | 0 | 0  | 0  | 0 | 0  |
| <i>Amorphonostoc</i>          | 0  | 6   | 46  | 5   | 0   | 0  | 0  | 0 | 0  | 0  | 0 | 0  |
| <i>Anabaena</i>               | 0  | 0   | 0   | 1   | 43  | 0  | 0  | 0 | 0  | 0  | 0 | 0  |
| Gloeobacteria                 | 39 | 107 | 19  | 80  | 605 | 67 | 0  | 0 | 0  | 0  | 0 | 5  |
| Gloeobacteriales              | 39 | 107 | 19  | 80  | 605 | 67 | 0  | 0 | 0  | 0  | 0 | 5  |
| Gloeobacter                   | 39 | 107 | 19  | 80  | 605 | 67 | 0  | 0 | 0  | 0  | 0 | 5  |
| <i>Gloeobacter</i>            | 39 | 107 | 19  | 80  | 605 | 67 | 0  | 0 | 0  | 0  | 0 | 5  |
| Oscillatoriophyceae           | 0  | 3   | 0   | 2   | 25  | 5  | 0  | 0 | 0  | 0  | 0 | 0  |
| Chroococcales                 | 0  | 3   | 0   | 2   | 25  | 5  | 0  | 0 | 0  | 0  | 0 | 0  |
| Chroococcales                 | 0  | 3   | 0   | 2   | 25  | 5  | 0  | 0 | 0  | 0  | 0 | 0  |
| <i>Chroococcus</i>            | 0  | 2   | 0   | 2   | 25  | 5  | 0  | 0 | 0  | 0  | 0 | 0  |
| <i>Cyanothece</i>             | 0  | 1   | 0   | 0   | 0   | 0  | 0  | 0 | 0  | 0  | 0 | 0  |
| Oscillatoriales               | 0  | 0   | 11  | 0   | 0   | 0  | 0  | 0 | 0  | 0  | 0 | 0  |
| Oscillatoriales               | 0  | 0   | 11  | 0   | 0   | 0  | 0  | 0 | 0  | 0  | 0 | 0  |
| <i>Microcoleus</i>            | 0  | 0   | 11  | 0   | 0   | 0  | 0  | 0 | 0  | 0  | 0 | 0  |
| Deinococcus-Thermus           | 16 | 63  | 296 | 95  | 47  | 64 | 0  | 0 | 0  | 0  | 0 | 0  |
| Hadobacteria                  | 16 | 63  | 296 | 95  | 47  | 64 | 0  | 0 | 0  | 0  | 0 | 0  |
| Deinococcales                 | 16 | 63  | 296 | 95  | 47  | 64 | 0  | 0 | 0  | 0  | 0 | 0  |
| Deinococcaceae                | 16 | 63  | 296 | 95  | 47  | 64 | 0  | 0 | 0  | 0  | 0 | 0  |
| <i>Deinobacter</i>            | 16 | 63  | 296 | 95  | 47  | 64 | 0  | 0 | 0  | 0  | 0 | 0  |
| Trueperaceae                  | 0  | 0   | 0   | 0   | 0   | 0  | 0  | 0 | 0  | 0  | 0 | 0  |
| <i>Truepera</i>               | 0  | 0   | 0   | 0   | 0   | 0  | 0  | 0 | 0  | 0  | 0 | 0  |
| Firmicutes                    | 67 | 561 | 30  | 145 | 263 | 58 | 0  | 0 | 0  | 0  | 0 | 0  |
| Bacilli                       | 67 | 561 | 30  | 145 | 263 | 58 | 0  | 0 | 17 | 0  | 0 | 0  |
| Bacillales                    | 67 | 561 | 30  | 145 | 263 | 58 | 0  | 0 | 0  | 0  | 0 | 0  |
| Bacillaceae                   | 67 | 561 | 30  | 145 | 263 | 58 | 0  | 0 | 0  | 0  | 0 | 0  |
| <i>Bacillus</i>               | 67 | 549 | 25  | 145 | 263 | 58 | 0  | 0 | 0  | 0  | 0 | 0  |
| <i>Geobacillus</i>            | 0  | 12  | 5   | 0   | 0   | 0  | 0  | 0 | 0  | 0  | 0 | 0  |
| Clostridia                    | 0  | 0   | 0   | 0   | 0   | 0  | 0  | 0 | 0  | 0  | 0 | 0  |
| Clostridiales                 | 0  | 0   | 0   | 0   | 0   | 0  | 0  | 0 | 0  | 0  | 0 | 0  |
| Peptococcaceae                | 0  | 0   | 0   | 0   | 0   | 0  | 0  | 0 | 0  | 0  | 0 | 0  |
| <i>Desulfitobacterium</i>     | 0  | 0   | 0   | 0   | 0   | 0  | 0  | 0 | 0  | 0  | 0 | 0  |
| Gemmatimonadetes              | 33 | 33  | 6   | 4   | 37  | 67 | 12 | 0 | 0  | 11 | 5 | 21 |
| Gemmatimonadetes              | 29 | 33  | 6   | 4   | 34  | 67 | 0  | 0 | 0  | 0  | 0 | 3  |
| Gemmatimonadales              | 29 | 33  | 6   | 4   | 34  | 67 | 0  | 0 | 0  | 0  | 0 | 3  |
| Gemmatimonadaceae             | 29 | 33  | 6   | 4   | 34  | 67 | 0  | 0 | 0  | 0  | 0 | 3  |
| <i>Gemmatimonas</i>           | 29 | 33  | 6   | 4   | 34  | 67 | 0  | 0 | 0  | 0  | 0 | 3  |
| Unclassified Gemmatimonadetes | 4  | 0   | 0   | 0   | 3   | 0  | 12 | 0 | 0  | 11 | 5 | 18 |
| Nitrospirae                   | 0  | 2   | 0   | 0   | 0   | 0  | 0  | 0 | 0  | 0  | 0 | 0  |
| Nitrospira                    | 0  | 2   | 0   | 0   | 0   | 0  | 0  | 0 | 0  | 0  | 0 | 0  |
| Nitrospirales                 | 0  | 2   | 0   | 0   | 0   | 0  | 0  | 0 | 0  | 0  | 0 | 0  |
| Nitrospiraceae                | 0  | 2   | 0   | 0   | 0   | 0  | 0  | 0 | 0  | 0  | 0 | 0  |



|                           |     |     |      |     |      |     |      |      |      |      |      |      |
|---------------------------|-----|-----|------|-----|------|-----|------|------|------|------|------|------|
| <i>Nitrospira</i>         | 0   | 2   | 0    | 0   | 0    | 0   | 0    | 0    | 0    | 0    | 0    | 0    |
| Planctomycetes            | 34  | 87  | 139  | 18  | 582  | 190 | 0    | 2    | 139  | 5    | 0    | 0    |
| Planctomycetacia          | 34  | 87  | 139  | 18  | 582  | 190 | 0    | 0    | 0    | 0    | 0    | 0    |
| Planctomycetales          | 34  | 87  | 139  | 18  | 582  | 190 | 0    | 0    | 0    | 0    | 0    | 0    |
| Planctomycetaceae         | 34  | 87  | 139  | 18  | 582  | 190 | 0    | 0    | 0    | 0    | 0    | 0    |
| <i>Isosphaera</i>         | 6   | 1   | 3    | 0   | 104  | 9   | 0    | 0    | 0    | 0    | 0    | 0    |
| <i>Pirella</i>            | 22  | 41  | 19   | 0   | 25   | 13  | 0    | 0    | 0    | 0    | 0    | 0    |
| <i>Planctomyces</i>       | 0   | 6   | 0    | 0   | 0    | 0   | 0    | 0    | 0    | 0    | 0    | 0    |
| <i>Rhodopirellula</i>     | 0   | 0   | 0    | 0   | 0    | 0   | 0    | 0    | 0    | 0    | 0    | 0    |
| <i>Singulisphaera</i>     | 6   | 39  | 117  | 18  | 453  | 168 | 0    | 0    | 0    | 5    | 0    | 0    |
| Proteobacteria            | 642 | 412 | 1097 | 239 | 1164 | 269 | 1878 | 2477 | 1592 | 1537 | 3405 | 3350 |
| Alphaproteobacteria       | 189 | 343 | 772  | 226 | 960  | 236 | 1707 | 1760 | 1423 | 900  | 3164 | 2690 |
| Caulobacter               | 11  | 5   | 381  | 2   | 52   | 0   | 0    | 0    | 0    | 0    | 0    | 0    |
| Caulobacteraceae          | 11  | 5   | 381  | 2   | 52   | 0   | 0    | 0    | 0    | 0    | 0    | 0    |
| <i>Asticcacaulis</i>      | 0   | 0   | 0    | 0   | 0    | 0   | 0    | 0    | 0    | 0    | 0    | 0    |
| <i>Brevundimonas</i>      | 0   | 0   | 0    | 0   | 0    | 0   | 0    | 0    | 0    | 0    | 0    | 0    |
| <i>Caulobacter</i>        | 0   | 0   | 0    | 0   | 0    | 0   | 0    | 0    | 0    | 0    | 0    | 0    |
| <i>Phenylobacterium</i>   | 11  | 5   | 381  | 2   | 52   | 0   | 0    | 0    | 0    | 0    | 0    | 0    |
| Rhizobiales               | 178 | 338 | 391  | 224 | 891  | 232 | 1707 | 1760 | 1423 | 892  | 3162 | 2685 |
| Beijerinckiaceae          | 0   | 1   | 0    | 0   | 0    | 5   | 0    | 0    | 0    | 2    | 0    | 1    |
| <i>Beijerinckia</i>       | 0   | 1   | 0    | 0   | 0    | 5   | 0    | 0    | 0    | 2    | 0    | 1    |
| Bradyrhizobiaceae         | 28  | 57  | 220  | 44  | 105  | 42  | 666  | 594  | 219  | 115  | 118  | 247  |
| <i>Bradyrhizobium</i>     | 28  | 31  | 203  | 44  | 105  | 27  | 666  | 594  | 219  | 115  | 118  | 247  |
| <i>Oligotropha</i>        | 0   | 0   | 15   | 0   | 0    | 0   | 0    | 0    | 0    | 0    | 0    | 0    |
| <i>Rhodopseudomonas</i>   | 0   | 26  | 2    | 0   | 0    | 3   | 0    | 0    | 0    | 0    | 0    | 0    |
| Methylobacteriaceae       | 39  | 11  | 52   | 180 | 466  | 59  | 1020 | 1056 | 1137 | 670  | 3000 | 2398 |
| <i>Methylobacterium</i>   | 39  | 11  | 52   | 180 | 466  | 59  | 1020 | 1056 | 1137 | 670  | 3000 | 2398 |
| Methylocystaceae          | 0   | 4   | 1    | 0   | 0    | 23  | 0    | 0    | 0    | 0    | 0    | 0    |
| <i>Methylocystis</i>      | 0   | 4   | 1    | 0   | 0    | 23  | 0    | 0    | 0    | 0    | 0    | 0    |
| Phyllobacteriaceae        | 0   | 25  | 15   | 0   | 209  | 55  | 0    | 42   | 10   | 41   | 41   | 33   |
| <i>Mesorhizobium</i>      | 0   | 25  | 15   | 0   | 209  | 55  | 0    | 42   | 10   | 41   | 41   | 33   |
| Rhizobiaceae              | 5   | 42  | 95   | 0   | 87   | 34  | 21   | 68   | 57   | 64   | 2    | 3    |
| <i>Agrobacterium</i>      | 0   | 19  | 0    | 0   | 23   | 14  | 0    | 13   | 0    | 0    | 0    | 0    |
| <i>Pelagibacterium</i>    | 0   | 0   | 36   | 0   | 3    | 0   | 0    | 0    | 0    | 0    | 0    | 0    |
| <i>Rhizobium</i>          | 5   | 16  | 37   | 0   | 55   | 13  | 20   | 40   | 57   | 0    | 2    | 0    |
| <i>Sinorhizobium</i>      | 0   | 7   | 22   | 0   | 6    | 7   | 1    | 15   | 0    | 64   | 0    | 3    |
| Xanthobacteraceae         | 0   | 0   | 5    | 0   | 0    | 3   | 0    | 0    | 0    | 0    | 0    | 0    |
| <i>Azorhizobium</i>       | 0   | 0   | 1    | 0   | 0    | 2   | 0    | 0    | 0    | 0    | 0    | 0    |
| <i>Starkeya</i>           | 0   | 0   | 4    | 0   | 0    | 1   | 0    | 0    | 0    | 0    | 0    | 0    |
| Rhodobacterales           | 0   | 0   | 0    | 0   | 0    | 0   | 0    | 0    | 0    | 6    | 2    | 1    |
| Rhodobacteraceae          | 0   | 0   | 0    | 0   | 0    | 0   | 0    | 0    | 0    | 6    | 2    | 1    |
| <i>Ketogulonicigenium</i> | 0   | 0   | 0    | 0   | 0    | 0   | 0    | 0    | 0    | 6    | 2    | 1    |
| Rhodospirillales          | 0   | 0   | 0    | 0   | 0    | 0   | 0    | 0    | 0    | 0    | 0    | 3    |
| Gluconobacteraceae        | 0   | 0   | 0    | 0   | 0    | 0   | 0    | 0    | 0    | 0    | 0    | 0    |
| <i>Acidiphilium</i>       | 0   | 0   | 0    | 0   | 0    | 0   | 0    | 0    | 0    | 0    | 0    | 0    |
| <i>Gluconobacter</i>      | 0   | 0   | 0    | 0   | 0    | 0   | 0    | 0    | 0    | 0    | 0    | 0    |
| Rhodospirillaceae         | 0   | 0   | 0    | 0   | 0    | 0   | 0    | 0    | 0    | 0    | 0    | 3    |
| <i>Azospirillum</i>       | 0   | 0   | 0    | 0   | 0    | 0   | 0    | 0    | 0    | 0    | 0    | 0    |
| <i>Rhodospirillum</i>     | 2   | 2   | 2    | 2   | 2    | 2   | 2    | 2    | 2    | 2    | 2    | 2    |
| Sphingomonadales          | 0   | 0   | 0    | 0   | 17   | 4   | 0    | 0    | 0    | 2    | 0    | 1    |
| Sphingomonadaceae         | 0   | 0   | 0    | 0   | 17   | 4   | 0    | 0    | 0    | 2    | 0    | 1    |
| <i>Sphingobium</i>        | 0   | 0   | 0    | 0   | 17   | 0   | 0    | 0    | 0    | 0    | 0    | 0    |
| <i>Sphingomonas</i>       | 0   | 0   | 0    | 0   | 0    | 4   | 0    | 0    | 0    | 1    | 0    | 1    |
| <i>Sphingopyxis</i>       | 0   | 0   | 0    | 0   | 0    | 0   | 0    | 0    | 0    | 1    | 0    | 0    |
| Betaproteobacteria        | 36  | 6   | 26   | 1   | 132  | 18  | 97   | 192  | 72   | 98   | 173  | 206  |
| Burkholderiales           | 36  | 6   | 26   | 1   | 132  | 18  | 97   | 192  | 72   | 98   | 173  | 206  |
| Alcaligenaceae            | 0   | 0   | 0    | 0   | 0    | 0   | 0    | 0    | 0    | 0    | 0    | 0    |
| <i>Achromobacter</i>      | 0   | 0   | 0    | 0   | 0    | 0   | 0    | 0    | 0    | 0    | 0    | 0    |
| <i>Bordetella</i>         | 0   | 0   | 0    | 0   | 0    | 0   | 0    | 0    | 0    | 0    | 0    | 0    |
| Burkholderiaceae          | 0   | 0   | 7    | 0   | 24   | 1   | 19   | 183  | 68   | 71   | 141  | 177  |
| <i>Burkholderia</i>       | 0   | 0   | 0    | 0   | 2    | 0   | 2    | 18   | 1    | 0    | 8    | 2    |
| <i>Cupravidus</i>         | 0   | 0   | 2    | 0   | 0    | 1   | 17   | 99   | 41   | 34   | 102  | 117  |
| <i>Ralstonia</i>          | 0   | 0   | 5    | 0   | 22   | 0   | 0    | 66   | 26   | 37   | 31   | 58   |
| Comamonadaceae            | 36  | 0   | 19   | 1   | 106  | 1   | 1    | 9    | 3    | 18   | 32   | 28   |
| <i>Acidivorax</i>         | 1   | 0   | 8    | 1   | 0    | 0   | 0    | 0    | 0    | 0    | 0    | 0    |
| <i>Albidoferax</i>        | 0   | 0   | 0    | 0   | 10   | 1   | 0    | 0    | 0    | 0    | 0    | 0    |
| <i>Alicyclophilus</i>     | 0   | 0   | 0    | 0   | 0    | 0   | 0    | 0    | 0    | 0    | 0    | 0    |
| <i>Curvibacter</i>        | 0   | 0   | 0    | 0   | 0    | 0   | 0    | 0    | 0    | 0    | 0    | 0    |
| <i>Delftia</i>            | 0   | 0   | 0    | 0   | 0    | 0   | 0    | 6    | 3    | 18   | 32   | 28   |
| <i>Ramlibacter</i>        | 0   | 0   | 0    | 0   | 62   | 0   | 1    | 0    | 0    | 0    | 0    | 0    |

|                           |     |    |     |    |     |    |     |      |     |     |     |     |
|---------------------------|-----|----|-----|----|-----|----|-----|------|-----|-----|-----|-----|
| <i>Variovorax</i>         | 35  | 0  | 11  | 0  | 34  | 0  | 0   | 0    | 0   | 0   | 0   | 0   |
| <i>Verminephrobacter</i>  | 0   | 0  | 0   | 0  | 0   | 0  | 0   | 3    | 0   | 0   | 0   | 0   |
| Oxalobacteraceae          | 0   | 5  | 0   | 0  | 1   | 0  | 76  | 0    | 1   | 9   | 0   | 1   |
| <i>Collimonas</i>         | 0   | 0  | 0   | 0  | 1   | 0  | 75  | 0    | 0   | 8   | 0   | 1   |
| <i>Herbaspirillum</i>     | 0   | 5  | 0   | 0  | 0   | 0  | 1   | 0    | 1   | 1   | 0   | 0   |
| Unclassified              | 0   | 1  | 0   | 0  | 1   | 16 | 1   | 0    | 0   | 0   | 0   | 0   |
| <i>Leptothrix</i>         | 0   | 0  | 0   | 0  | 0   | 0  | 0   | 0    | 0   | 0   | 0   | 0   |
| <i>Methylibium</i>        | 0   | 1  | 0   | 0  | 1   | 16 | 1   | 0    | 0   | 0   | 0   | 0   |
| Neisseriales              | 0   | 0  | 0   | 0  | 0   | 0  | 0   | 0    | 0   | 0   | 0   | 0   |
| Chromobacteriaceae        | 0   | 0  | 0   | 0  | 0   | 0  | 0   | 0    | 0   | 0   | 0   | 0   |
| <i>Pseudogulbenkiania</i> | 0   | 0  | 0   | 0  | 0   | 0  | 0   | 0    | 0   | 0   | 0   | 0   |
| Rhodocyclales             | 0   | 0  | 0   | 0  | 0   | 0  | 0   | 5    | 0   | 0   | 0   | 0   |
| Rhodocyclaceae            | 0   | 0  | 0   | 0  | 0   | 0  | 0   | 5    | 0   | 0   | 0   | 0   |
| <i>Azoarcus</i>           | 0   | 0  | 0   | 0  | 0   | 0  | 0   | 5    | 0   | 0   | 0   | 0   |
| Gammaproteobacteria       | 413 | 63 | 299 | 12 | 71  | 15 | 73  | 523  | 97  | 538 | 68  | 454 |
| Chromatiaceae             | 0   | 0  | 0   | 0  | 0   | 0  | 0   | 0    | 0   | 0   | 0   | 0   |
| Chromatiaceae             | 0   | 0  | 0   | 0  | 0   | 0  | 0   | 0    | 0   | 0   | 0   | 0   |
| <i>Marichromatium</i>     | 0   | 0  | 0   | 0  | 0   | 0  | 0   | 0    | 0   | 0   | 0   | 0   |
| Oceanospirillales         | 0   | 2  | 0   | 0  | 0   | 0  | 0   | 8    | 0   | 0   | 0   | 0   |
| Halomonadaceae            | 0   | 2  | 0   | 0  | 0   | 0  | 0   | 8    | 0   | 0   | 0   | 0   |
| <i>Chromohalobacter</i>   | 0   | 0  | 0   | 0  | 0   | 0  | 0   | 8    | 0   | 0   | 0   | 0   |
| <i>Deleya</i>             | 0   | 2  | 0   | 0  | 0   | 0  | 0   | 0    | 0   | 0   | 0   | 0   |
| Pseudomonadales           | 300 | 21 | 70  | 0  | 47  | 2  | 72  | 439  | 80  | 483 | 44  | 317 |
| Methylococcaceae          | 0   | 0  | 0   | 0  | 0   | 0  | 0   | 3    | 3   | 2   | 0   | 0   |
| <i>Methylomonas</i>       | 0   | 0  | 0   | 0  | 0   | 0  | 0   | 3    | 3   | 2   | 0   | 0   |
| Pseudomonadaceae          | 300 | 21 | 70  | 0  | 47  | 2  | 72  | 436  | 77  | 481 | 44  | 317 |
| <i>Azotobacter</i>        | 0   | 0  | 0   | 0  | 0   | 0  | 0   | 82   | 1   | 1   | 4   | 13  |
| <i>Pseudomonas</i>        | 300 | 21 | 70  | 0  | 47  | 2  | 72  | 354  | 76  | 480 | 40  | 304 |
| Xanthomonadales           | 113 | 40 | 229 | 12 | 24  | 13 | 1   | 76   | 17  | 55  | 24  | 137 |
| Xanthomonadaceae          | 113 | 40 | 229 | 12 | 24  | 13 | 1   | 76   | 17  | 55  | 24  | 137 |
| <i>Lysobacter</i>         | 0   | 0  | 0   | 0  | 0   | 0  | 0   | 2    | 0   | 3   | 6   | 3   |
| <i>Pseudoxanthomonas</i>  | 0   | 0  | 0   | 0  | 0   | 0  | 0   | 2    | 0   | 0   | 0   | 0   |
| <i>Rhodanobacter</i>      | 0   | 0  | 0   | 0  | 0   | 0  | 0   | 2    | 0   | 0   | 0   | 0   |
| <i>Stenotrophomonas</i>   | 0   | 0  | 0   | 0  | 0   | 0  | 1   | 0    | 0   | 0   | 0   | 0   |
| <i>Xanthomonas</i>        | 113 | 40 | 229 | 12 | 24  | 13 | 0   | 72   | 17  | 52  | 18  | 134 |
| Epsilonproteobacteria     | 4   | 0  | 0   | 0  | 1   | 0  | 1   | 2    | 0   | 1   | 0   | 0   |
| Desulfobacterales         | 4   | 0  | 0   | 0  | 1   | 0  | 1   | 2    | 0   | 1   | 0   | 0   |
| Geobacteraceae            | 4   | 0  | 0   | 0  | 1   | 0  | 0   | 0    | 0   | 0   | 0   | 0   |
| <i>Geobacter</i>          | 4   | 0  | 0   | 0  | 1   | 0  | 0   | 0    | 0   | 0   | 0   | 0   |
| Myxococcaceae             | 0   | 0  | 0   | 0  | 0   | 0  | 0   | 2    | 0   | 1   | 0   | 0   |
| <i>Anaeromyxobacter</i>   | 0   | 0  | 0   | 0  | 0   | 0  | 0   | 2    | 0   | 1   | 0   | 0   |
| <i>Myxococcus</i>         | 0   | 0  | 0   | 0  | 0   | 0  | 0   | 2    | 0   | 1   | 0   | 0   |
| Sorangiaceae              | 0   | 0  | 9   | 0  | 0   | 0  | 1   | 0    | 0   | 0   | 0   | 0   |
| <i>Sporiangium</i>        | 0   | 0  | 9   | 0  | 0   | 0  | 1   | 0    | 0   | 0   | 0   | 0   |
| Spirochaetae              | 0   | 0  | 0   | 0  | 0   | 0  | 0   | 0    | 0   | 0   | 0   | 0   |
| Spirochaetes              | 0   | 0  | 0   | 0  | 0   | 0  | 0   | 0    | 0   | 0   | 0   | 0   |
| Spirochaetales            | 0   | 0  | 0   | 0  | 0   | 0  | 0   | 0    | 0   | 0   | 0   | 0   |
| Spirochaetaceae           | 0   | 0  | 0   | 0  | 0   | 0  | 0   | 0    | 0   | 0   | 0   | 0   |
| <i>Spirochaeta</i>        | 0   | 0  | 0   | 0  | 0   | 0  | 0   | 0    | 0   | 0   | 0   | 0   |
| Verrucomicrobia           | 0   | 0  | 0   | 0  | 0   | 0  | 0   | 0    | 0   | 0   | 0   | 0   |
| Verrucomicrobia           | 0   | 0  | 0   | 0  | 0   | 0  | 0   | 0    | 0   | 0   | 0   | 0   |
| Opitutae                  | 0   | 0  | 0   | 0  | 0   | 0  | 0   | 0    | 0   | 0   | 0   | 0   |
| Opitutaceae               | 0   | 0  | 0   | 0  | 0   | 0  | 0   | 0    | 0   | 0   | 0   | 0   |
| <i>Opitutus</i>           | 0   | 0  | 0   | 0  | 0   | 0  | 0   | 0    | 0   | 0   | 0   | 0   |
| Unclassified              | 0   | 0  | 0   | 0  | 0   | 0  | 0   | 0    | 0   | 0   | 0   | 0   |
| Unclassified Bacteria     | 1   | 22 | 60  | 6  | 129 | 21 | 315 | 2604 | 145 | 554 | 228 | 967 |
